# Supplementary material for: Low-energy Ga2O3 polymorphs with low electron effective masses
Source: Royal Society of Chemistry journal article supplement (doi:10.1039/d1cp05271c), 2022-01-01
Supplement: d1cp05271c1.pdf [file d1cp05271c1.pdf]

## Supplementary material:

### Low-energy Ga<sub>2</sub>O<sub>3</sub> polymorphs with low carrier effective masses

Qingyang Fan,<sup>1,2,\*</sup> Ruida Zhao<sup>1</sup>, Wei Zhang<sup>3</sup>, Yanxing Song<sup>3</sup>, Minglei Sun<sup>4</sup>, Udo Schwingenschlög<sup>4,\*</sup>

<sup>1</sup>College of Information and Control Engineering, Xi'an University of Architecture and Technology, Xi'an 710055, China

<sup>2</sup>Shaanxi Key Laboratory of Nano Materials and Technology, Xi'an, 710055, China

<sup>3</sup>School of Microelectronics, Xidian University, Xi'an 710071, China

<sup>4</sup>Physical Science and Engineering Division (PSE), King Abdullah University of Science and Technology (KAUST), Thuwal 23955-6900, Saudi Arabia

\*fanqy@xauat.edu.cn, udo.schwingenschlogl@kaust.edu.sa

## Crystallographic Information P2<sub>1</sub>/c Ga<sub>2</sub>O<sub>3</sub>

```
_symmetry_space_group_name_H-M      'P21/C'  
_symmetry_Int_Tables_number         14  
_symmetry_cell_setting               monoclinic  
loop_  
_symmetry_equiv_pos_as_xyz  
  x,y,z  
 -x,y+1/2,-z+1/2  
 -x,-y,-z  
  x,-y+1/2,z+1/2  
_cell_length_a                       9.7704  
_cell_length_b                       8.7618  
_cell_length_c                       5.8104  
_cell_angle_alpha                    90.0000  
_cell_angle_beta                     149.5868  
_cell_angle_gamma                    90.0000  
loop_  
_atom_site_label  
_atom_site_type_symbol  
_atom_site_fract_x  
_atom_site_fract_y  
_atom_site_fract_z  
_atom_site_U_iso_or_equiv  
_atom_site_adp_type  
_atom_site_occupancy  
O1      O      0.67952   0.29563   0.77246   0.00000   Uiso   1.00  
O2      O      0.83087   0.88921   0.73081   0.00000   Uiso   1.00  
O3      O      0.74889   0.52154   0.58037   0.00000   Uiso   1.00  
Ga4     Ga      0.05258   0.54083   0.82169   0.00000   Uiso   1.00  
Ga5     Ga      0.46712   0.65729   0.73249   0.00000   Uiso   1.00
```

## Crystallographic Information Pnma-I Ga<sub>2</sub>O<sub>3</sub>

```
_symmetry_space_group_name_H-M      'PNMA'  
_symmetry_Int_Tables_number         62  
_symmetry_cell_setting               orthorhombic  
loop_  
_symmetry_equiv_pos_as_xyz  
  x,y,z  
 -x+1/2,-y,z+1/2  
 -x,y+1/2,-z  
  x+1/2,-y+1/2,-z+1/2  
 -x,-y,-z  
  x+1/2,y,-z+1/2  
  x,-y+1/2,z  
 -x+1/2,y+1/2,z+1/2  
_cell_length_a                       7.0734  
_cell_length_b                       3.3107  
_cell_length_c                       9.8351  
_cell_angle_alpha                    90.0000  
_cell_angle_beta                     90.0000  
_cell_angle_gamma                    90.0000  
loop_  
_atom_site_label  
_atom_site_type_symbol  
_atom_site_fract_x  
_atom_site_fract_y  
_atom_site_fract_z  
_atom_site_U_iso_or_equiv  
_atom_site_adp_type  
_atom_site_occupancy  
O1      O      0.41147   0.75000   0.41452   0.00000   Uiso   1.00  
Ga5     Ga      0.02396   0.75000   0.27556   0.00000   Uiso   1.00  
O2      O      0.08469   0.25000   0.36673   0.00000   Uiso   1.00  
O3      O      0.73881   0.25000   0.83710   0.00000   Uiso   1.00  
Ga4     Ga      0.80285   0.25000   0.01866   0.00000   Uiso   1.00
```

## Crystallographic Information Pnma-II Ga<sub>2</sub>O<sub>3</sub>

```
_symmetry_space_group_name_H-M      'PNMA'  
_symmetry_Int_Tables_number         62  
_symmetry_cell_setting               orthorhombic  
loop_  
_symmetry_equiv_pos_as_xyz  
  x,y,z  
 -x+1/2,-y,z+1/2  
 -x,y+1/2,-z  
  x+1/2,-y+1/2,-z+1/2  
 -x,-y,-z  
  x+1/2,y,-z+1/2  
  x,-y+1/2,z  
 -x+1/2,y+1/2,z+1/2  
_cell_length_a                       5.9003  
_cell_length_b                       3.0933  
_cell_length_c                       12.1263  
_cell_angle_alpha                    90.0000  
_cell_angle_beta                     90.0000  
_cell_angle_gamma                    90.0000  
loop_  
_atom_site_label  
_atom_site_type_symbol  
_atom_site_fract_x  
_atom_site_fract_y  
_atom_site_fract_z  
_atom_site_U_iso_or_equiv  
_atom_site_adp_type  
_atom_site_occupancy  
O1      O      0.84749  0.25000  0.41503  0.00000  Uiso  1.00  
O3      O      0.39839  0.25000  0.42279  0.00000  Uiso  1.00  
Ga4     Ga      0.12405  0.25000  0.34039  0.00000  Uiso  1.00  
O2      O      0.62506  0.75000  0.24579  0.00000  Uiso  1.00  
Ga5     Ga      0.64094  0.75000  0.40866  0.00000  Uiso  1.00
```

**Elastic constants  $C_{ij}$  (GPa) of  $P2_1/c$   $Ga_2O_3$** 

|           |           |           |           |           |           |
|-----------|-----------|-----------|-----------|-----------|-----------|
| 175.48445 | 62.04100  | 66.13096  | 0.00000   | 7.56231   | 0.00000   |
| 62.04100  | 252.58488 | 87.88119  | 0.00000   | -43.59696 | 0.00000   |
| 66.13096  | 87.88119  | 203.85126 | 0.00000   | -8.76458  | 0.00000   |
| 0.00000   | 0.00000   | 0.00000   | 45.05845  | 0.00000   | -16.88817 |
| 7.56231   | -43.59696 | -8.76458  | 0.00000   | 59.21376  | 0.00000   |
| 0.00000   | 0.00000   | 0.00000   | -16.88817 | 0.00000   | 47.04479  |

**Elastic constants  $C_{ij}$  (GPa) of  $Pnma-I$   $Ga_2O_3$** 

|           |           |           |          |          |          |
|-----------|-----------|-----------|----------|----------|----------|
| 210.45319 | 90.45296  | 180.71827 | 0.00000  | 0.00000  | 0.00000  |
| 90.45296  | 269.32226 | 121.76815 | 0.00000  | 0.00000  | 0.00000  |
| 108.71827 | 121.76815 | 256.73331 | 0.00000  | 0.00000  | 0.00000  |
| 0.00000   | 0.00000   | 0.00000   | 53.07579 | 0.00000  | 0.00000  |
| 0.00000   | 0.00000   | 0.00000   | 0.00000  | 72.56831 | 0.00000  |
| 0.00000   | 0.00000   | 0.00000   | 0.00000  | 0.00000  | 51.38698 |

**Elastic constants  $C_{ij}$  (GPa) of  $Pnma-II$   $Ga_2O_3$** 

|           |           |           |          |          |          |
|-----------|-----------|-----------|----------|----------|----------|
| 310.78212 | 58.79830  | 115.83764 | 0.00000  | 0.00000  | 0.00000  |
| 58.79830  | 299.78024 | 120.04074 | 0.00000  | 0.00000  | 0.00000  |
| 115.83764 | 120.04074 | 193.35150 | 0.00000  | 0.00000  | 0.00000  |
| 0.00000   | 0.00000   | 0.00000   | 80.87248 | 0.00000  | 0.00000  |
| 0.00000   | 0.00000   | 0.00000   | 0.00000  | 95.87205 | 0.00000  |
| 0.00000   | 0.00000   | 0.00000   | 0.00000  | 0.00000  | 41.26736 |

**Born mechanical stability conditions for monoclinic symmetry ( $P2_1/c$   $Ga_2O_3$ )**

$$C_{11}>0, C_{22}>0, C_{33}>0, C_{44}>0, C_{55}>0, C_{66}>0,$$

$$[C_{11}+C_{22}+C_{33}+2(C_{12}+C_{13}+C_{23})]>0,$$

$$(C_{33}C_{55}-C_{35}^2)>0, (C_{44}C_{66}-C_{46}^2)>0, (C_{22}+C_{33}-2C_{23})>0,$$

$$[C_{22}(C_{33}C_{55}-C_{35}^2)+2C_{23}C_{25}C_{35}-C_{23}^2C_{55}-C_{25}^2C_{33}]>0,$$

$$\{2[C_{15}C_{25}(C_{33}C_{12}-C_{13}C_{23})+C_{15}C_{35}(C_{22}C_{13}-C_{12}C_{23})+C_{25}C_{35}(C_{11}C_{23}-C_{12}C_{13})]-[C_{15}^2(C_{22}C_{33}-C_{23}^2)+C_{25}^2(C_{11}C_{33}-C_{13}^2)+C_{35}^2(C_{11}C_{22}-C_{12}^2)]+C_{55}D\}>0,$$

$$D=C_{11}C_{22}C_{33}-C_{11}C_{23}^2-C_{22}C_{13}^2-C_{33}C_{12}^2+2C_{12}C_{13}C_{23}.$$

**Born mechanical stability conditions for orthorhombic symmetry ( $Pnma-I$  and  $Pnma-II$   $Ga_2O_3$ )**

$$C_{11}>0, C_{11}C_{22}>C_{12}^2,$$

$$C_{11}C_{22}C_{33}+2C_{12}C_{13}C_{23}-C_{11}C_{23}^2-C_{22}C_{13}^2-C_{33}C_{12}^2>0,$$

$$C_{44}>0, C_{55}>0, C_{66}>0.$$
